# Supplementary material for: Experience of Service Questionnaire (ESQ) in children and adolescents: factor structure, reliability, validity, item parameters and interpretability of the parent version for practical use in Greece
Source: bioRxiv or medRxiv preprint supplement (doi:10.1101/2024.07.05.24309986), 2024-07-05
Supplement: Supplementary file [file media-1.pdf]

## Supplementary Material

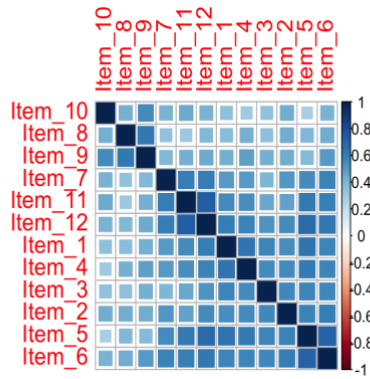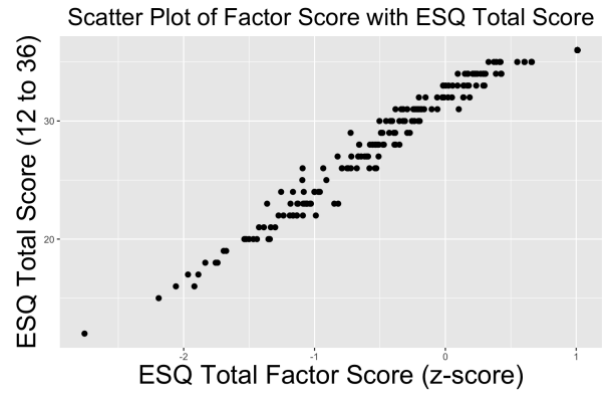

**Histogram of ESQ Total Score**

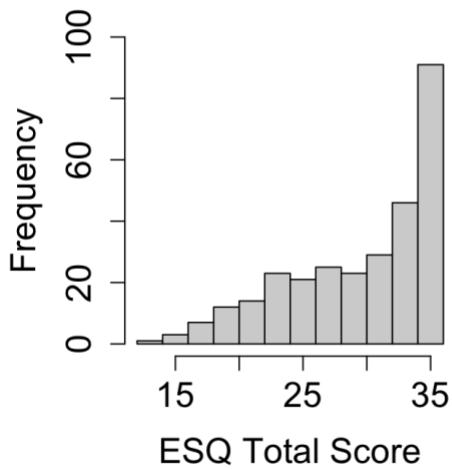

**Histogram of ESQ Factor Score**

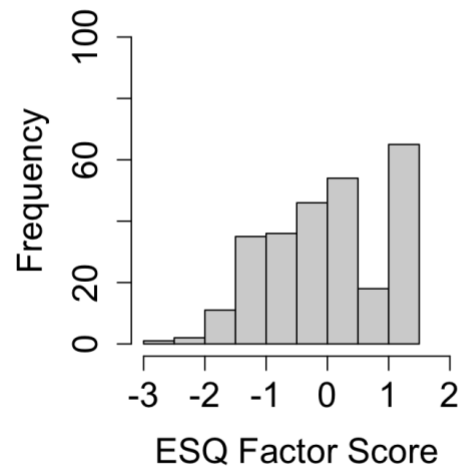

**Supplemental Figure S1.** Correlation matrix, histograms of the summed-based score and IRT-based score and scatter plot showing the association between summed score and IRT-based score

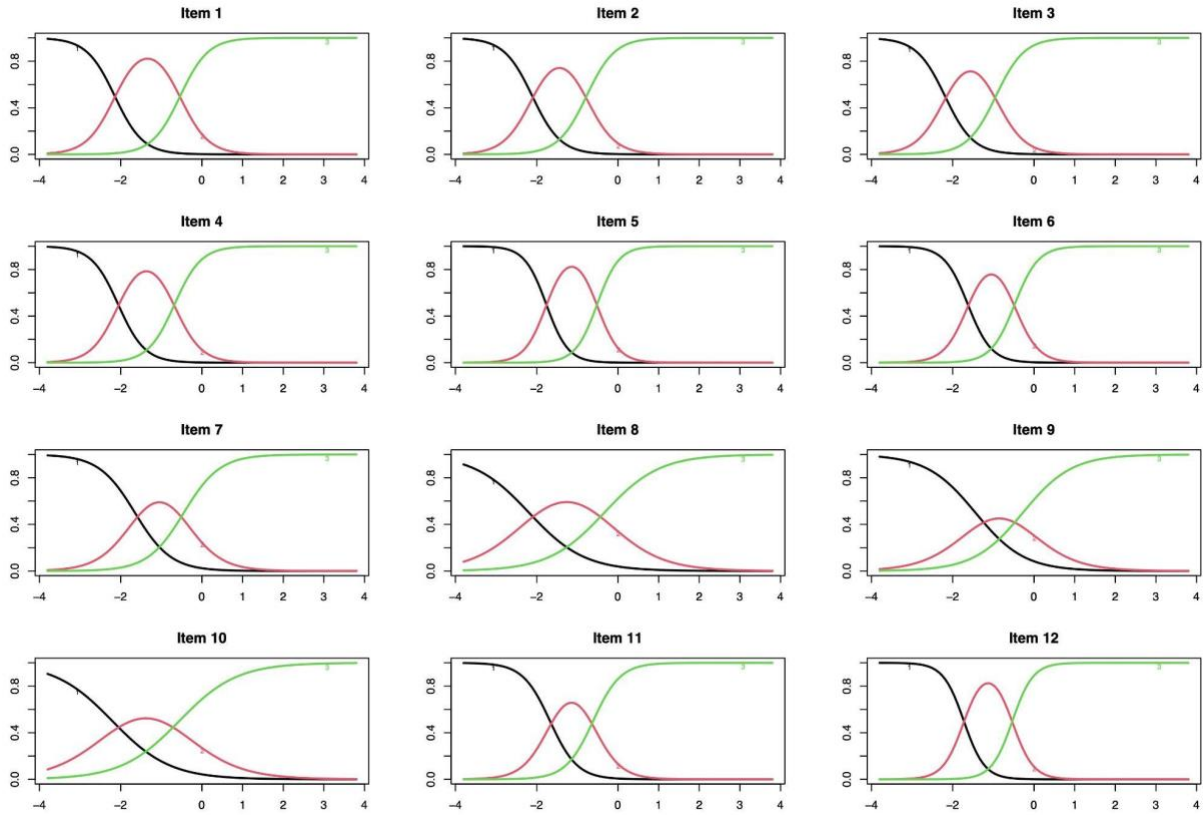

**Supplemental Figure S2: Item Response Characteristic Curves (unidimensional solution)**

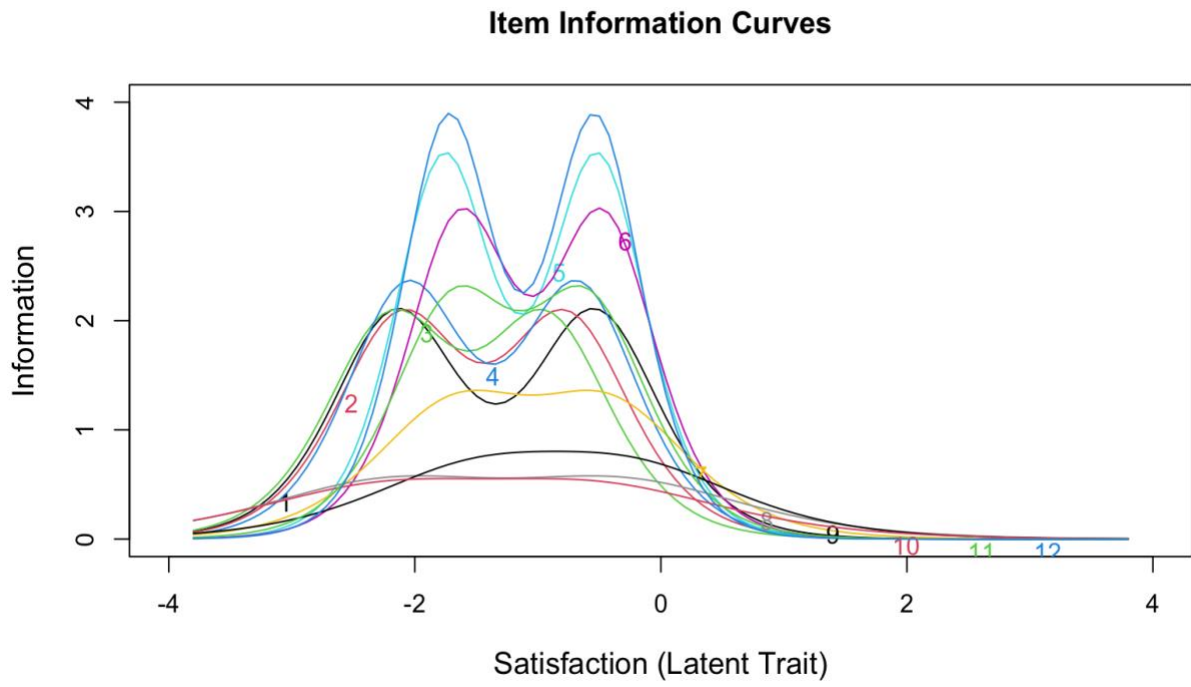

**Supplemental Figure S3.** Item Information Curves (unidimensional solution)
